# Supplementary material for: Meta-analytic connectivity modelling of deception-related brain regions
Source: PubMed Central journal article supplement (PMC8386837; doi:10.1371/journal.pone.0248909), 2021-08-25
Supplement: pone.0248909.s001.pdf [file pone.0248909.s001.pdf]

|               | <b>Projection ALE Values:</b> |              |              |              |              |              |              |
|---------------|-------------------------------|--------------|--------------|--------------|--------------|--------------|--------------|
| <b>Seeds:</b> | <b>L Ins</b>                  | <b>L SFG</b> | <b>R Ins</b> | <b>R SMG</b> | <b>L SMG</b> | <b>L MFG</b> | <b>R MFG</b> |
| <b>L Ins</b>  |                               | 0            | 0            | 0.11735      | 0.07968      | 0.5865       | 0            |
| <b>L SFG</b>  | 0                             |              | 0            | 0.03743      | 0.17955      | 0            | 0            |
| <b>R Ins</b>  | 0                             | 0            |              | 0            | 0.02686      | 0.13334      | 0            |
| <b>R SMG</b>  | 0.00021                       | 0.00001      | 0            |              | 0.00015      | 0.00305      | 0.00013      |
| <b>L SMG</b>  | 0                             | 0.00016      | 0.00002      | 0            |              | 0.0046       | 0.00001      |
| <b>L MFG</b>  | 0.01184                       | 0            | 0.00881      | 0.00348      | 0.05574      |              | 0.00825      |
| <b>R MFG</b>  | 0                             | 0            | 0            | 0.00058      | 0.01057      | 0.03082      |              |
