# Supplementary material for: Meta-analytic connectivity modelling of deception-related brain regions
Source: PubMed Central journal article supplement (PMC8386837; doi:10.1371/journal.pone.0248909), 2021-08-25

A

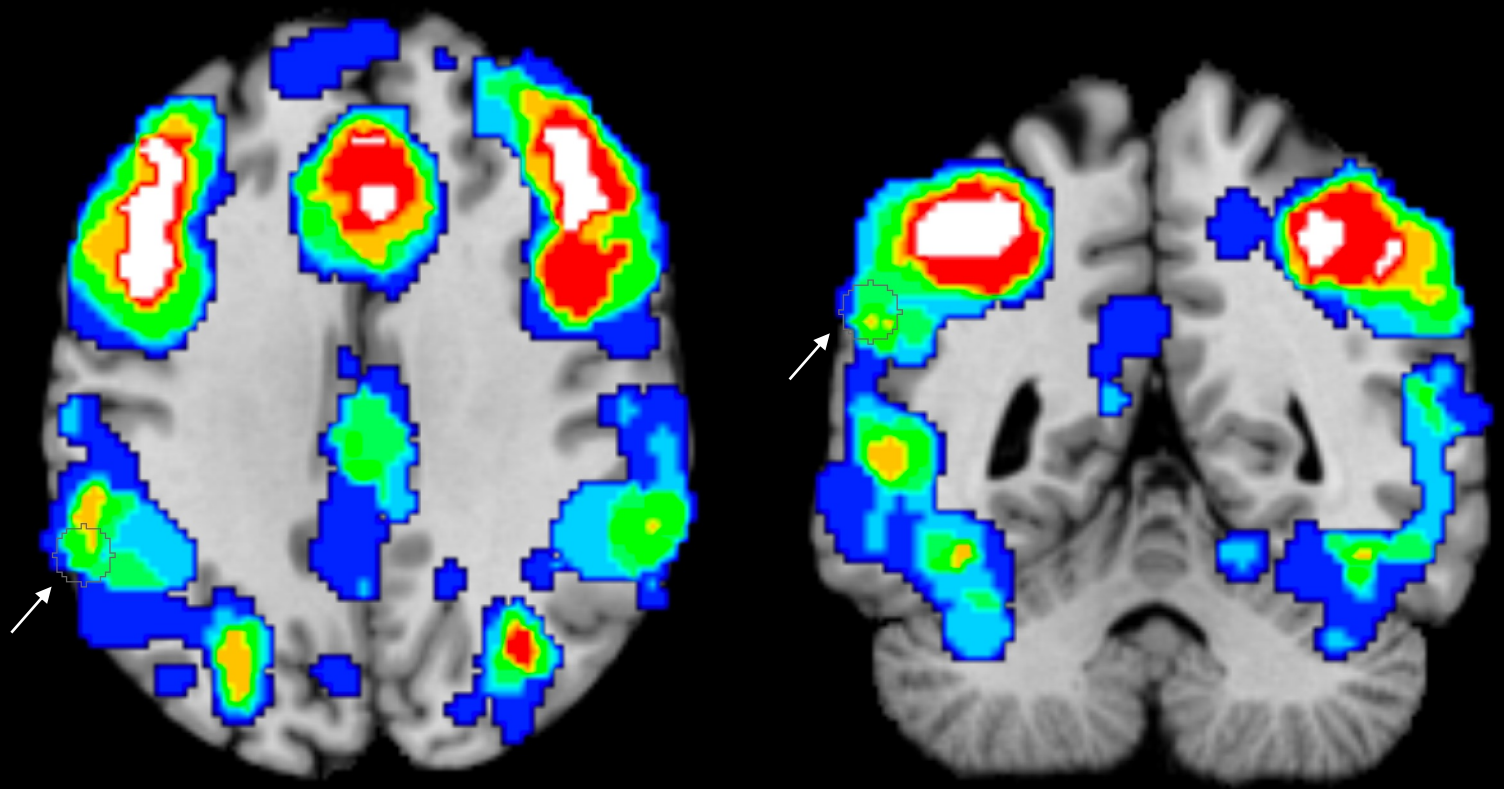

B

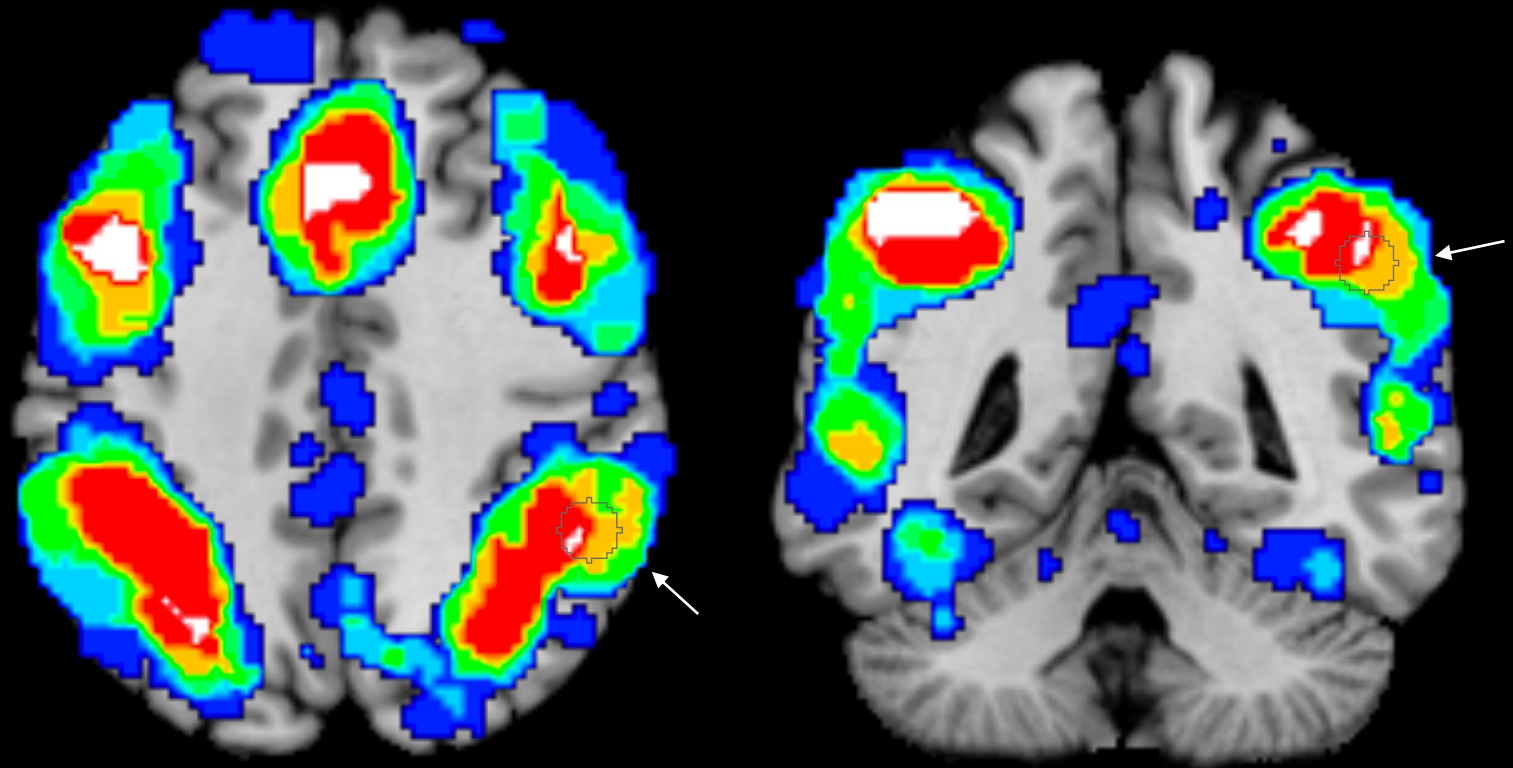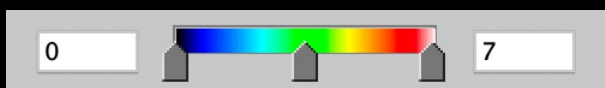

Supplement: pone.0248909.s003.pdf [file pone.0248909.s003.pdf]
